# Supplementary material for: Highly Reproducible Surface-Enhanced Raman Scattering Detection of Alternariol Using Silver-Embedded Silica Nanoparticles
Source: PubMed Central journal article supplement (PMC7349361; doi:10.3390/s20123523), 2020-06-22
Supplement: sensors-20-03523-s001.pdf [file sensors-20-03523-s001.pdf]

Letter

# Highly Reproducible Surface-Enhanced Raman Scattering Detection of Alternariol Using Silver-Embedded Silica Nanoparticles

Eunil Hahm †, Yoon-Hee Kim †, Xuan-Hung Pham and Bong-Hyun Jun \*

Department of Bioscience and Biotechnology, Konkuk University, Seoul 05029, Korea; greenice@konkuk.ac.kr (E.H.); yoonhees@konkuk.ac.kr (Y.-H.K.); phamricky@gmail.com (X.-H.P.)

\* Correspondence: bjun@konkuk.ac.kr; Tel.: +82-2-450-0521

† E.H. and Y.-H.K. contributed equally to this work.

Received: 28 May 2020; Accepted: 19 June 2020; Published: 22 June 2020

## 1. Supplementary.

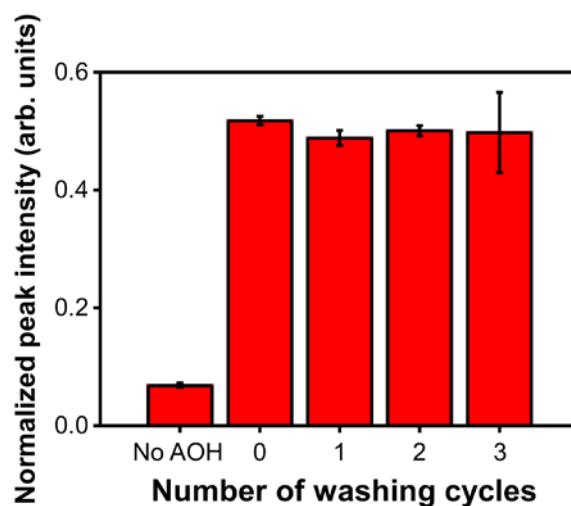

**Figure S1.** SERS intensity of SiO<sub>2</sub>@Ag NPs added to 10<sup>-6</sup> M AOH at 1304 cm<sup>-1</sup> after washing with ethanol.

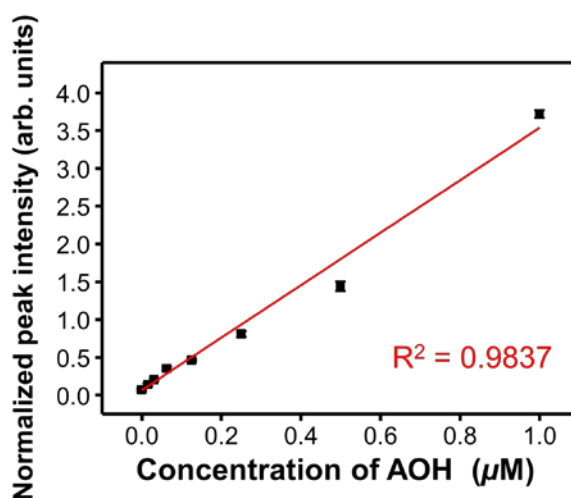

**Figure S2.** SERS intensity plot at 1254 cm<sup>-1</sup> of SiO<sub>2</sub>@Ag NPs treated with various concentrations of AOH: (i) 1.000, (ii) 0.500, (iii) 0.250, (iv) 0.125, (v) 0.063, (vi) 0.031, (vii) 0.016, and (viii) 0 μM.

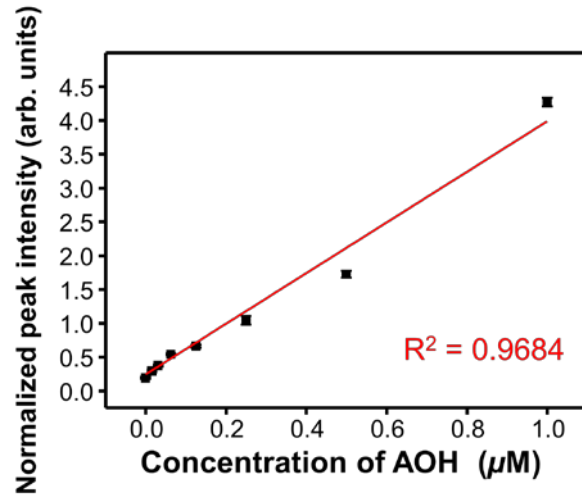

**Figure S3.** SERS intensity plot at  $1609\text{ cm}^{-1}$  of  $\text{SiO}_2\text{@Ag}$  NPs treated with various concentrations of AOH: (i) 1.000, (ii) 0.500, (iii) 0.250, (iv) 0.125, (v) 0.063, (vi) 0.031, (vii) 0.016, and (viii)  $0\text{ }\mu\text{M}$ .

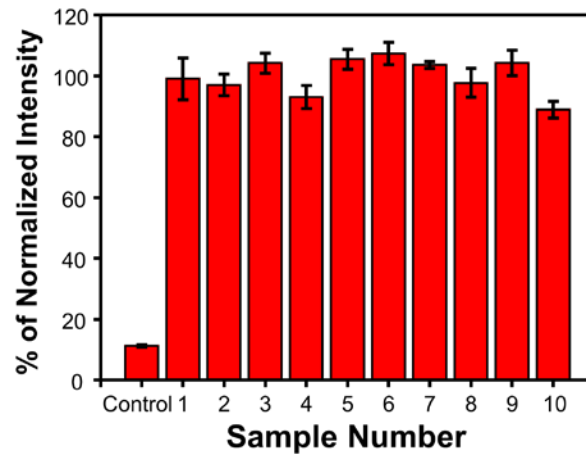

**Figure S4.** Reproducibility of SERS intensity at  $1304\text{ cm}^{-1}$  collected from 10 samples of different NP batches. The samples were prepared by treating each batch of  $\text{SiO}_2\text{@Ag}$  NPs with  $0.5\text{ }\mu\text{M}$  AOH. The relative standard deviation (RSD) was calculated as 5.65%.
